# Supplementary material for: Structure and dynamics in aqueous mixtures of glycerol: insights from molecular dynamics simulations
Source: Royal Society of Chemistry journal article supplement (doi:10.1039/d4sm00741g), 2024-01-01
Supplement: d4sm00741g1.pdf [file d4sm00741g1.pdf]

## Structure and dynamics in aqueous mixtures of glycerol: insights from molecular dynamics simulations

Martina Požar<sup>a</sup> and Bernarda Lovrinčević<sup>a</sup>

<sup>a</sup> University of Split, Faculty of Science, Ruđera Boškovića 33, 21000 Split, Croatia

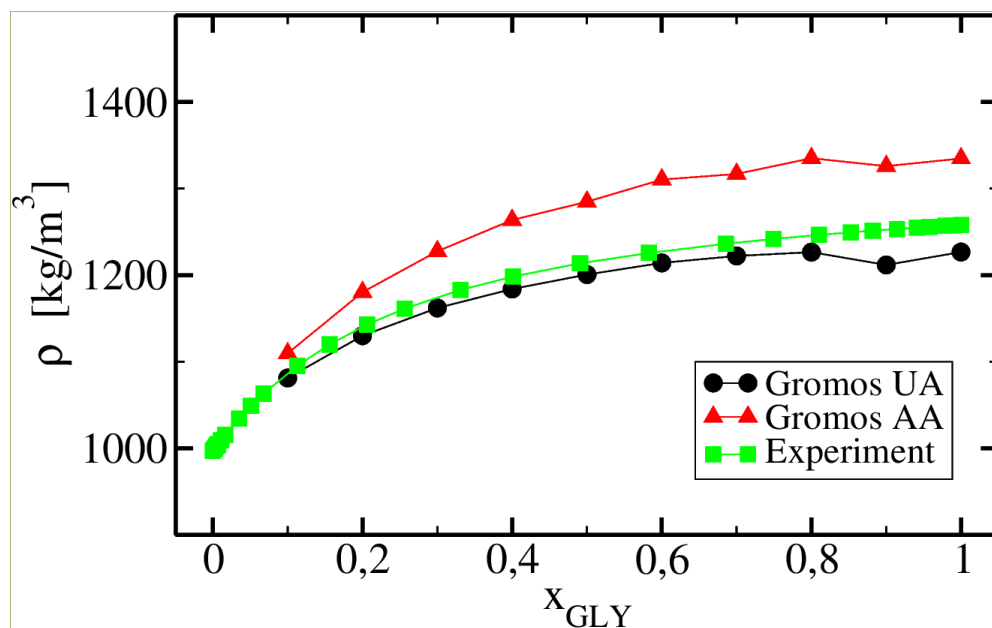

Figure S1. Density  $\rho$  vs. glycerol concentration  $x_{\text{GLY}}$  in UA glycerol-water (black dots) and AA glycerol-water (red triangles). Uncertainty of the data is up to  $5 \text{ kg/m}^3$  (for mixtures) and about  $20 \text{ kg/m}^3$  for pure glycerol. Lines are just guidelines for the eye. Experimental results are from Ref. 46 in the main manuscript.

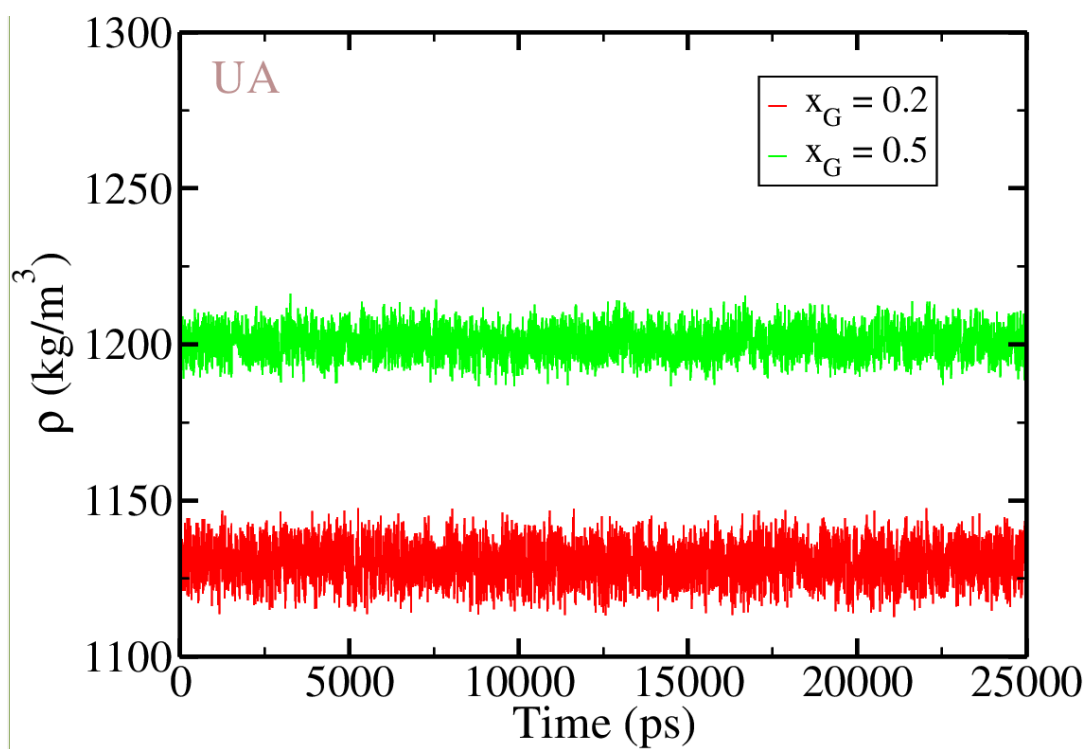

Figure S2. Density  $\rho$  versus time  $t$  for two selected concentrations  $x_G=0.2$  (red line) and 0.5 (green line).

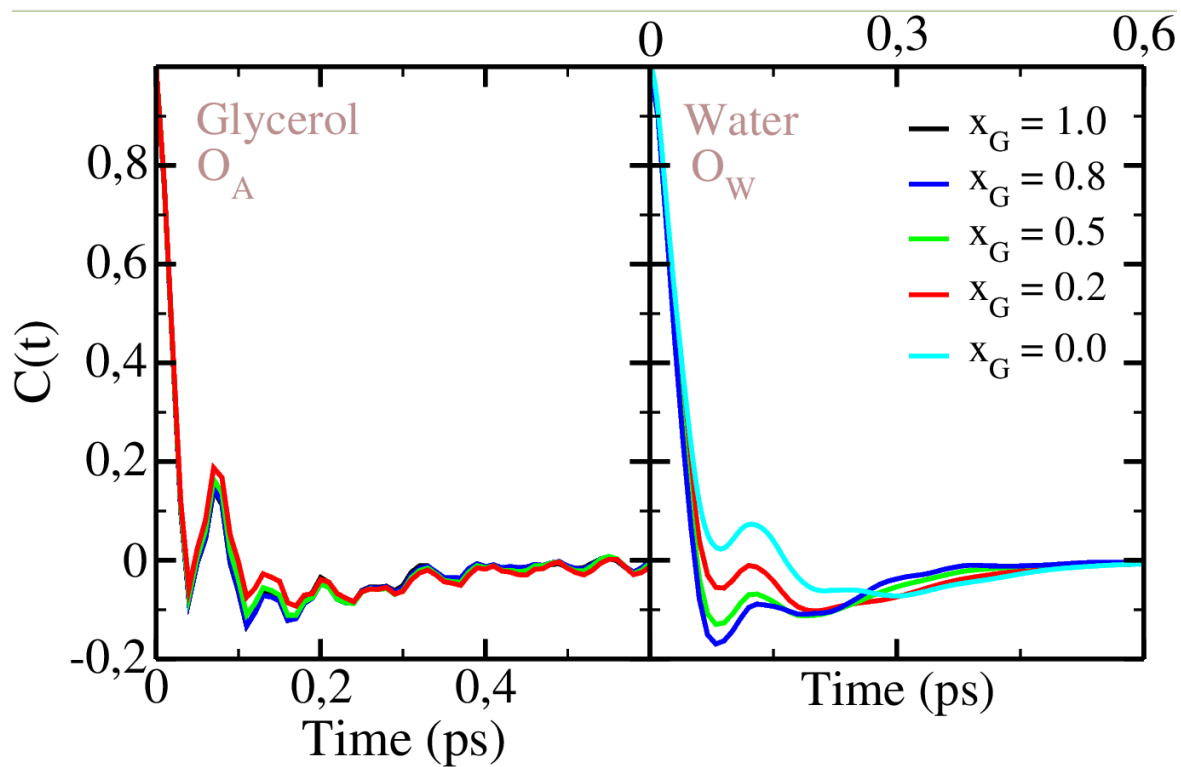

Figure S3. Velocity autocorrelation function  $C_v(t)$  for O in glycerol AA model (left panel) and O in water (right panel). Color convention:  $x_G=1.0$  (black),  $x_G=0.8$  (blue),  $x_G=0.5$  (green),  $x_G=0.2$  (red),  $x_G=0.0$  (cyan).

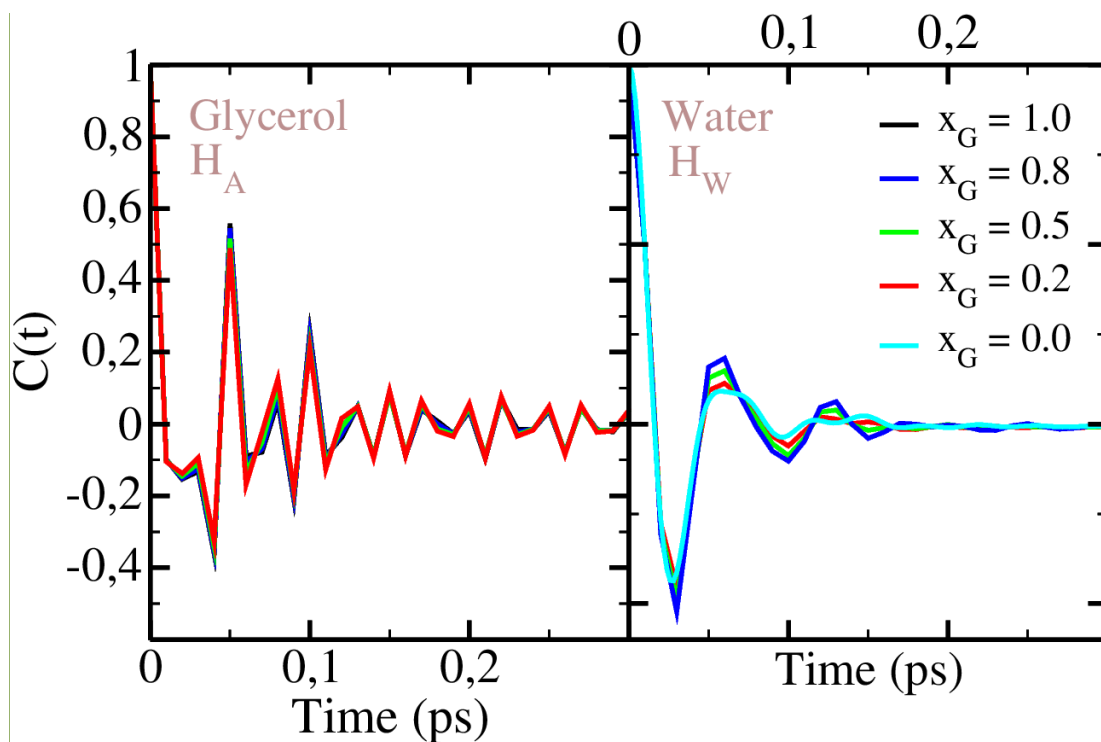

Figure S4. Velocity autocorrelation function  $C_v(t)$  for H in glycerol UA model (left panel) and H in water (right panel). Color convention:  $x_G=1.0$  (black),  $x_G=0.8$  (blue),  $x_G=0.5$  (green),  $x_G=0.2$  (red),  $x_G=0.0$  (cyan).

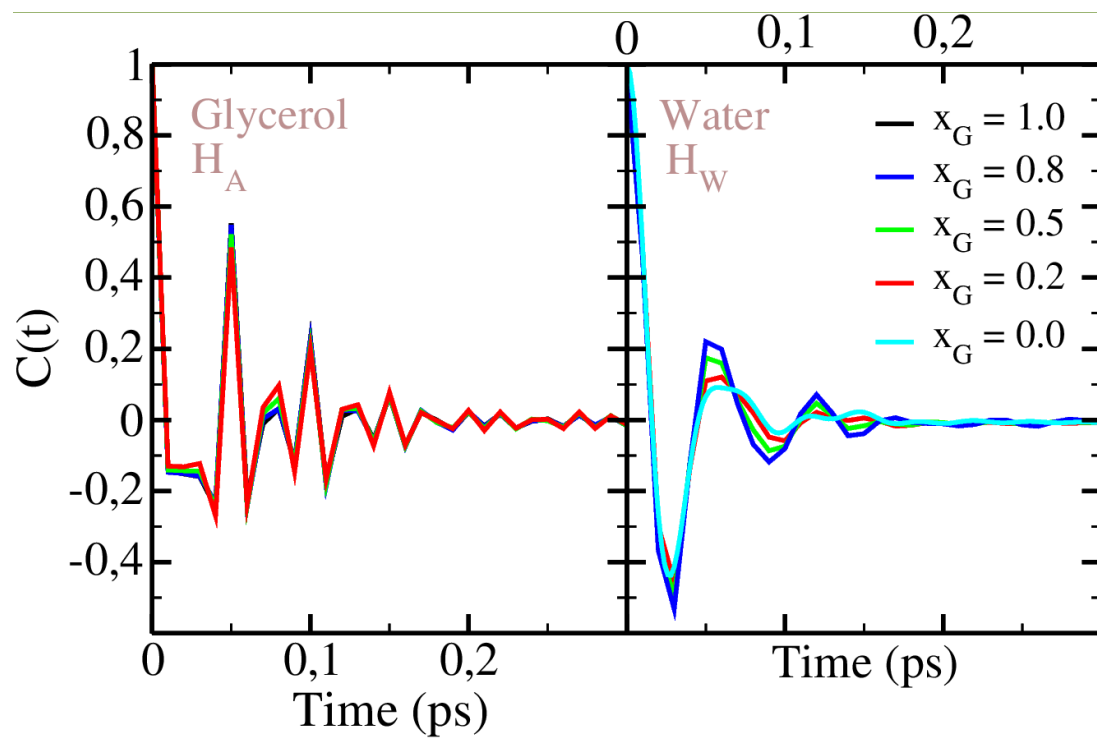

Figure S5. Velocity autocorrelation function  $C_v(t)$  for H in glycerol AA model (left panel) and H in water (right panel). Color convention:  $x_G=1.0$  (black),  $x_G=0.8$  (blue),  $x_G=0.5$  (green),  $x_G=0.2$  (red),  $x_G=0.0$  (cyan).
